# Supplementary material for: Pharmacokinetics/Pharmacodynamics of Antiviral Agents Used to Treat SARS-CoV-2 and Their Potential Interaction with Drugs and Other Supportive Measures: A Comprehensive Review by the PK/PD of Anti-Infectives Study Group of the European Society of Antimicrobial Agents
Source: Springer Nature journal article supplement (doi:10.1007/s40262-020-00924-9), 2020-07-28
Supplement: MOESM2 [file 18226120]

## Appendix II:

### Supplementary Table 2

Relevant drug interactions of antiviral agents used to treat COVID-19 presented in table 1 with clinically relevant and/or severe selected drugs (alphabetically):

#### Remdesivir<sup>1,2</sup>

|               |                                                                         |
|---------------|-------------------------------------------------------------------------|
| Betamethasone | Potential decreased exposure of remdesivir                              |
| Bosentan      | Potential decreased exposure of remdesivir                              |
| Dexamethasone | Potential decreased exposure of remdesivir                              |
| Rifabutin     | Potential decreased exposure of remdesivir                              |
| Rifampicin    | Decreased exposure of remdesivir<br>Co-administration should be avoided |
| Rifapentine   | Potential decreased exposure of remdesivir                              |

#### Chloroquine<sup>1,3</sup>

|                |                                                                                                             |
|----------------|-------------------------------------------------------------------------------------------------------------|
| Adalimumab     | Increased side effects, including hematological toxicity<br>Monitor hematological laboratory parameters     |
| Amiodarone     | Increased exposure of co-medication<br>ECG monitoring is recommended<br>Co-administration should be avoided |
| Amitriptyline  | Increased exposure of co-medication<br>ECG monitoring is recommended                                        |
| Antacids       | Potential decreased effect chloroquine                                                                      |
| Azathioprine   | Increased side effects, including hematological toxicity<br>Monitor hematological laboratory parameters     |
| Azithromycin   | ECG monitoring is recommended                                                                               |
| Bedaquiline    | ECG monitoring is recommended                                                                               |
| Bepidil        | Increased exposure of co-medication<br>extra ECG monitoring<br>Co-administration should be avoided          |
| Betrixaban     | Increased exposure of co-medication: consider lower dose of co-medication                                   |
| Calcium salts  | Reduced absorption thus separate dosing by at least 4 hours                                                 |
| Chlorpromazine | Increased exposure of co-medication<br>ECG monitoring is recommended                                        |
| Cisapride      | ECG monitoring is recommended                                                                               |
| Citalopram     | ECG monitoring is recommended                                                                               |

|                         |                                                                                                             |
|-------------------------|-------------------------------------------------------------------------------------------------------------|
| Clarithromycin          | ECG monitoring is recommended<br>Use lowest effective dose of chloroquine                                   |
| Clofazimine             | ECG monitoring is recommended                                                                               |
| Clomipramine            | ECG monitoring is recommended                                                                               |
| Clozapine               | ECG monitoring is recommended                                                                               |
| Cyclosporine            | Increased exposure of co-medication                                                                         |
| Dabigatran              | Increased exposure of co-medication: consider lower dose of co-medication                                   |
| Lopinavir/Ritonavir     | Increased exposure chloroquine: ECG monitoring                                                              |
| Delamanid               | ECG monitoring is recommended                                                                               |
| Desipramine             | Increased exposure of co-medication<br>ECG monitoring is recommended                                        |
| Dextropropoxyphene      | ECG monitoring is recommended<br>Co-administration should be avoided                                        |
| Digoxin                 | Increased exposure of co-medication: ECG monitoring                                                         |
| Dolasetron              | ECG monitoring is recommended                                                                               |
| Domperidone             | ECG monitoring is recommended                                                                               |
| Edoxaban                | Increased exposure of co-medication: consider lower dose of co-medication                                   |
| Erythromycin            | ECG monitoring is recommended<br>Use lowest effective dose of chloroquine                                   |
| Escitalopram            | ECG monitoring is recommended                                                                               |
| Flecainide              | Increased exposure of co-medication<br>ECG monitoring is recommended<br>Co-administration should be avoided |
| Fluphenazine            | Increased exposure of co-medication<br>ECG monitoring is recommended                                        |
| Granisetron             | ECG monitoring is recommended                                                                               |
| H2 receptor antagonists | Reduced absorption                                                                                          |
| Haloperidol             | ECG monitoring is recommended                                                                               |
| Hydrocodone             | Increased exposure of comedication                                                                          |
| Iloperidone             | ECG monitoring is recommended                                                                               |
| Imipramine              | ECG monitoring is recommended                                                                               |
| Itraconazole            | Increased exposure chloroquine                                                                              |
| Levofloxacin            | ECG monitoring is recommended                                                                               |
| Levomepromazine         | Increased exposure of co-medication<br>ECG monitoring is recommended                                        |
| Lithium                 | ECG monitoring is recommended                                                                               |
| Maprotiline             | Increased exposure of co-medication<br>ECG monitoring is recommended                                        |
| Methadone               | ECG monitoring is recommended                                                                               |
| Mexiletine              | Increased exposure of co-medication<br>ECG monitoring is recommended<br>Co-administration should be avoided |
| Moxifloxacin            | ECG monitoring is recommended                                                                               |
| Nortriptyline           | Increased exposure of co-medication                                                                         |

|                 |                                                                                                                                                              |
|-----------------|--------------------------------------------------------------------------------------------------------------------------------------------------------------|
|                 | ECG monitoring is recommended                                                                                                                                |
| Ofloxacin       | ECG monitoring is recommended                                                                                                                                |
| Ondansetron     | ECG monitoring is recommended                                                                                                                                |
| Perphenazine    | Increased exposure of co-medication<br>ECG monitoring is recommended                                                                                         |
| Pimozide        | ECG monitoring is recommended                                                                                                                                |
| Pipotiazine     | ECG monitoring is recommended                                                                                                                                |
| Posaconazole    | Increased exposure chloroquine                                                                                                                               |
| Propofol        | ECG monitoring is recommended                                                                                                                                |
| Quetiapine      | ECG monitoring is recommended                                                                                                                                |
| Ranolazine      | ECG monitoring is recommended                                                                                                                                |
| Rifabutin       | Decreased exposure chloroquine<br>Monitor chloroquine levels and consider increasing dose of chloroquine:<br>Co-administration should be avoided if possible |
| Rifampicin      | Decreased exposure chloroquine<br>Monitor chloroquine levels and consider increasing dose of chloroquine:<br>Co-administration should be avoided if possible |
| Risperidone     | Increased exposure of co-medication<br>ECG monitoring is recommended                                                                                         |
| Sevoflurane     | ECG monitoring is recommended                                                                                                                                |
| Sirolimus       | Increased exposure of co-medication                                                                                                                          |
| St. John's Wort | Decreased exposure of chloroquine<br>Co-administration should be avoided                                                                                     |
| Sulpiride       | ECG monitoring is recommended                                                                                                                                |
| Tacrolimus      | Increased exposure of co-medication                                                                                                                          |
| Telithromycin   | ECG monitoring is recommended                                                                                                                                |
| Thioridazine    | Increased exposure of co-medication<br>ECG monitoring is recommended, Co-administration should be avoided if possible                                        |
| Tiapride        | ECG monitoring is recommended                                                                                                                                |
| Tizanidine      | ECG monitoring is recommended                                                                                                                                |
| Trazodone       | ECG monitoring is recommended                                                                                                                                |
| Verapamil       | Increased exposure chloroquine: ECG monitoring                                                                                                               |
| Voriconazole    | Increased exposure chloroquine                                                                                                                               |
| Zisapridon      | ECG monitoring is recommended<br>Co-administration should be avoided                                                                                         |
| Zotepine        | ECG monitoring is recommended                                                                                                                                |
| Zuclopenthixol  | Increased exposure of co-medication<br>ECG monitoring is recommended                                                                                         |

**Lopinavir/Ritonavir**<sup>1</sup>

|                      |                                                                                                                                                      |
|----------------------|------------------------------------------------------------------------------------------------------------------------------------------------------|
| Alfentanil           | Potential increased exposure of comedication                                                                                                         |
| Aliskiren            | Do not co-administer, increased exposure co-medication                                                                                               |
| Amiodarone           | Do not co-administer, increased exposure co-medication, ECG monitoring                                                                               |
| Apixaban             | Do not co-administer, increased exposure co-medication. If needed, use apixaban at a reduced dose (e.g. 2.5 mg twice daily)                          |
| Atorvastatine        | Potential increased exposure of comedication (490%), daily atorvastatin should not exceed 20 mg                                                      |
| Bedaquiline          | Potential increased exposure of comedication (22%)                                                                                                   |
| Bepiridil            | Do not co-administer, increased exposure co-medication, ECG monitoring                                                                               |
| Bupivacaine          | Potential increased exposure of comedication                                                                                                         |
| Cisapride            | Do not co-administer, increased exposure co-medication, ECG monitoring                                                                               |
| Clarithromycin       | Potential increased exposure of comedication, ECG monitoring                                                                                         |
| Clindamycin          | Potential increased exposure of comedication                                                                                                         |
| Clopidogrel          | Do not co-administer, decreased exposure co-medication                                                                                               |
| Codeine              | Potential increased exposure of comedication, but also potential decrease of the analgesic effect due to reduced conversion to the active metabolite |
| Darunavir/cobicistat | Do not co-administer                                                                                                                                 |
| Delamanid            | Potential increased exposure of comedication                                                                                                         |
| Dexamethasone        | Potential increased exposure of comedication and decreased exposure of LPV/r                                                                         |
| Dexmedetomidine      | Potential decreased exposure of comedication                                                                                                         |
| Dextropropoxyphene   | Increased exposure of comedication<br>Do not co-administer                                                                                           |
| Diamorphine          | Potential decreased exposure of comedication                                                                                                         |
| Digoxin              | Potential increased exposure of comedication, ECG monitoring                                                                                         |
| Disopyramide         | Do not co-administer, increased exposure co-medication, ECG monitoring                                                                               |

|                    |                                                                                            |
|--------------------|--------------------------------------------------------------------------------------------|
| Dofetilide         | Do not co-administer, increased exposure co-medication, ECG monitoring                     |
| Domperidone        | Do not co-administer, increased exposure co-medication, ECG monitoring                     |
| Erythromycin       | Potential increased exposure of comedication                                               |
| Eplerenone         | Do not co-administer, increased exposure co-medication                                     |
| Etidocaine         | Potential increased exposure of comedication                                               |
| Fentanyl           | Potential increased exposure of comedication                                               |
| Flecainide         | Do not co-administer, increased exposure co-medication, ECG monitoring                     |
| Hydromorphone      | Potential decreased exposure of comedication                                               |
| Isavuconazol       | Potential increased exposure of comedication (96%), monitor levels                         |
| Ivabradine         | Do not co-administer, increased exposure co-medication                                     |
| Ketamine           | Potential increased exposure of comedication                                               |
| Lercanidipine      | Do not co-administer, increased exposure co-medication                                     |
| Lidocaine          | Potential increased exposure of comedication                                               |
| Lovastatine        | Do not co-administer, increased exposure co-medication                                     |
| Methadone          | Potential decreased exposure of comedication (53%), ECG monitoring                         |
| Methylprednisolone | Potential increased exposure of comedication                                               |
| Mexiletine         | Potential increased exposure of comedication                                               |
| Midazolam (oral)   | Do not co-administer, increased exposure co-medication                                     |
| Morphine           | Potential decreased exposure of comedication, but may also potentiate opiate effect in CNS |
| Moxifloxacin       | Potential decreased exposure of comedication                                               |
| Minaxolone         | Potential increased exposure of comedication                                               |
| Oxycodone          | Potential increased exposure of comedication (160%)                                        |
| Pimozide           | Do not co-administer, increased exposure co-medication, ECG monitoring                     |
| Propafenone        | Potential increased exposure of comedication                                               |
| Propofol           | Potential decreased exposure of comedication, ECG monitoring                               |

|                |                                                                                                                                                      |
|----------------|------------------------------------------------------------------------------------------------------------------------------------------------------|
| Quetiapine     | Do not co-administer, increased exposure co-medication, ECG monitoring. If both needed, 1/6 of normal of quetiapine dose is indicated                |
| Quinidine      | Potential increased exposure of comedication                                                                                                         |
| Ranolazine     | Do not co-administer, increased exposure co-medication                                                                                               |
| Rifabutin      | Potential increased exposure of comedication                                                                                                         |
| Rifampicin     | Decreased exposure of LPV/r 75%<br>Do not co-administer                                                                                              |
| Rifapentine    | Potential decreased exposure of LPV/r                                                                                                                |
| Rivaroxaban    | Do not co-administer, increased exposure co-medication                                                                                               |
| Rocuronium     | Potential increased exposure of comedication                                                                                                         |
| Rosuvastatine  | Potential increased exposure of comedication (108%), comedication dose should not exceed 10 mg                                                       |
| Sildenafil     | Do not co-administer, increased exposure co-medication                                                                                               |
| Simvastatine   | Do not co-administer, increased exposure co-medication                                                                                               |
| Sirolimus      | Do not co-administer, increased exposure co-medication                                                                                               |
| St John's wort | Do not co-administer, Decreased exposure of LPV/r                                                                                                    |
| Sufentanil     | Potential increased exposure of comedication                                                                                                         |
| Telithromycin  | Potential increased exposure of LPV/r, ECG monitoring                                                                                                |
| Ticagrelor     | Do not co-administer, increased exposure co-medication                                                                                               |
| Tinidazole     | Potential increased exposure of comedication                                                                                                         |
| Tizanidine     | Potential decreased exposure of comedication, ECG monitoring                                                                                         |
| Tramadol       | Potential increased exposure of comedication, but also potential decrease of the analgesic effect due to reduced conversion to the active metabolite |
| Triazolam      | Do not co-administer, increased exposure co-medication                                                                                               |
| Valproate      | Potential increased exposure of LPV/r (38%)                                                                                                          |
| Voriconazole   | Potential decreased or increased levels of comedication, monitor levels                                                                              |
| Ziprasidone    | Do not co-administer, increased exposure co-medication, ECG monitoring                                                                               |

### **Favipiravir**<sup>1</sup>

|                  |                                                                                           |
|------------------|-------------------------------------------------------------------------------------------|
| Alcuronium       | Potential increased exposure of co-medication                                             |
| Cephalexin       | Potential increased exposure of co-medication                                             |
| Ethinylestradiol | Potential increased exposure of co-medication (43%)                                       |
| Flucloxacillin   | Potential increased exposure of co-medication                                             |
| Levonorgestrel   | Potential increased exposure of co-medication                                             |
| Moxonidine       | Potential increased exposure of co-medication                                             |
| Norelgestromin   | Potential increased exposure of co-medication                                             |
| Norethisterone   | Potential increased exposure of co-medication                                             |
| Norgestimate     | Potential increased exposure of co-medication                                             |
| Norgestrel       | Potential increased exposure of co-medication                                             |
| Oseltamivir      | Potential increased exposure of co-medication (14%), not relevant in clinical practice    |
| Paracetamol      | Potential increased exposure of co-medication (14-16%), not relevant in clinical practice |
| Pioglitazone     | Potential increased exposure of co-medication                                             |
| Piperacillin     | Potential increased exposure of co-medication                                             |
| Replaglinide     | Potential increased exposure of co-medication (52%)                                       |
| Rosiglitazone    | Potential increased exposure of co-medication                                             |
| Tazobactam       | Potential increased exposure of co-medication                                             |
| Treprostinil     | Potential increased exposure of co-medication                                             |
| Ulipristal       | Potential increased exposure of co-medication                                             |

### **Ribavirin**<sup>1,3</sup>

|              |                                               |
|--------------|-----------------------------------------------|
| Azathioprine | Potential increased exposure of co-medication |
| Warfarin     | Potential decreased exposure to comedication  |

### **Arbidol/Umifenovir**

No dedicated drug interactions could be identified, however, based on the hepatic metabolism of the arbidol/umifenovir via CYP3A4 drug interactions between arbidol and CYP3A4 inhibitors and inducers seem likely.<sup>4</sup>

### **Hydroxychloroquine**<sup>5-56</sup>

|           |                                                                                                                                           |
|-----------|-------------------------------------------------------------------------------------------------------------------------------------------|
| Alfuzosin | Increased risk of QT-interval prolongation, co-administration is not advisable, ECG monitoring is advised                                 |
| Amiodaron | Increased risk of QT prolongation and TdP <sup>a</sup> , due to the long half-life of amiodarone, this interaction is possible even after |

|                  |                                                                                                                                |
|------------------|--------------------------------------------------------------------------------------------------------------------------------|
|                  | the discontinuation of amiodarone, ECG monitoring is advised, co-administration should be avoided                              |
| Amisulpride      | Increased risk of QT prolongation, ECG monitoring is advised, co-administration is not advisable                               |
| Amitriptyline    | Increased risk of QT-interval prolongation, co-administration is not advisable, ECG monitoring is advised                      |
| Anagrelide       | Increased risk of QT-interval prolongation, co-administration is not advisable, ECG monitoring is advised                      |
| Apomorphine      | Increased risk of QT-interval prolongation, co-administration is not advisable, ECG monitoring is advised                      |
| Aripiprazole     | Increased risk of QT-interval prolongation, co-administration is not advisable, ECG monitoring is advised                      |
| Arsenic Trioxide | Increased risk of QT-interval prolongation, co-administration is not advisable, ECG monitoring is advised                      |
| Asenapine        | Increased risk of QT-interval prolongation, co-administration is not advisable, ECG monitoring is advised                      |
| Astemizole       | Increased risk of QT-interval prolongation, co-administration is not advisable, ECG monitoring is advised                      |
| Atazanavir       | Increased risk of QT-interval prolongation, co-administration is not advisable, ECG monitoring is advised                      |
| Aurothioglucose  | Increased risk blood dyscrasias, co-administration is contraindicated                                                          |
| Azithromycin     | Increased risk of QT-interval prolongation, co-administration is not advisable, ECG monitoring is advised                      |
| Antacids         | Reduced absorption - separate dosing by at least 4h                                                                            |
| Bedaquiline      | Increased risk of QT-interval prolongation, co-administration is not advisable, ECG monitoring is advised                      |
| Bepidil          | Increased risk of QT-interval prolongation, co-administration is contraindicated, if used regardless ECG monitoring is advised |
| Buprenorphine    | Increased risk of QT-interval prolongation, co-administration is not advisable, ECG monitoring is advised                      |
| Buserelin        | Increased risk of QT-interval prolongation, co-administration is not advisable, ECG monitoring is advised                      |
| Calcium salts    | Reduced absorption, separate dosing by at least 4hrs                                                                           |
| Ceritinib        | Increased risk of QT-interval prolongation, co-administration is not advisable, withhold, reduce dose, or permanently          |



|                 |                                                                                                                                                                          |
|-----------------|--------------------------------------------------------------------------------------------------------------------------------------------------------------------------|
|                 | discontinue ceritinib for QTc interval prolongation, ECG monitoring is advised                                                                                           |
| Chloroquine     | Increased risk of QT-interval prolongation, co-administration is not advisable, ECG monitoring is advised                                                                |
| Chlorpromazine  | Increased risk of QT-interval prolongation, co-administration is not advisable, ECG monitoring is advised                                                                |
| Ciprofloxacin   | Increased risk of QT-interval prolongation, co-administration is not advisable, ECG monitoring is advised                                                                |
| Cisapride       | Life-threatening additive effects on the QT interval, increased risk of QT-interval prolongation and ventricular arrhythmias (TdP), co-administration is contraindicated |
| Citalopram      | Increased risk of QT-interval prolongation, co-administration is not advisable, ECG monitoring is advised                                                                |
| Clarithromycin  | Increased risk of QT-interval prolongation, co-administration is not advisable, ECG monitoring is advised                                                                |
| Clofazimine     | Increased risk of QT-interval prolongation, co-administration is not advisable, ECG monitoring is advised                                                                |
| Clomipramine    | Increased risk of QT-interval prolongation, co-administration is not advisable, ECG monitoring is advised                                                                |
| Clozapine       | Increased risk of QT-interval prolongation, co-administration is not advisable, ECG monitoring is advised                                                                |
| Crizotinib      | Increased risk of QT-interval prolongation, co-administration is not advisable, ECG monitoring is advised                                                                |
| Cyclobenzaprine | Increased risk of QT-interval prolongation, co-administration is not advisable, ECG monitoring is advised                                                                |
| Dabrafenib      | Increased risk of QT-interval prolongation, co-administration is not advisable, ECG monitoring is advised                                                                |
| Dasatinib       | Increased risk of QT-interval prolongation, co-administration is not advisable, ECG monitoring is advised                                                                |
| Degarelix       | Increased risk of QT-interval prolongation, co-administration is not advisable, ECG monitoring is advised                                                                |
| Delamanid       | Increased risk of QT-interval prolongation, co-administration is not advisable, ECG monitoring is advised                                                                |
| Desipramine     | Increased risk of QT-interval prolongation, co-administration is not advisable, ECG monitoring is advised                                                                |
| Deslorelin      | Increased risk of QT-interval prolongation, co-administration is not advisable, ECG monitoring is advised                                                                |

|                  |                                                                                                                                                                                                                                                                                                                  |
|------------------|------------------------------------------------------------------------------------------------------------------------------------------------------------------------------------------------------------------------------------------------------------------------------------------------------------------|
| Deutetrabenazine | Increased risk of QT-interval prolongation, an increase in the risk of TdP and/or sudden death, avoid co-administration                                                                                                                                                                                          |
| Digoxin          | Increased serum digoxin concentration, avoid concurrent use. If these two agents must be used together, monitor for signs of digoxin toxicity, follow serum digoxin concentrations more frequently during and for at least one month after the discontinuation of hydroxychloroquine.                            |
| Disopyramide     | Increased risk of QT-interval prolongation, co-administration is not advisable, ECG monitoring is advised                                                                                                                                                                                                        |
| Dofetilide       | Increased risk of QT-interval prolongation, co-administration is not advisable, ECG monitoring is advised                                                                                                                                                                                                        |
| Dolasetron       | Increased risk of QT-interval prolongation, co-administration is not advisable, ECG monitoring is advised                                                                                                                                                                                                        |
| Domperidone      | Increased risk of QT-interval prolongation, co-administration is not advisable, ECG monitoring is advised                                                                                                                                                                                                        |
| Donepezil        | Increased risk of QT-interval prolongation, increased risk of TdP, use caution when co-administering, ECG monitoring is advised                                                                                                                                                                                  |
| Doxepin          | Increased risk of QT-interval prolongation, co-administration is not advisable, ECG monitoring is advised                                                                                                                                                                                                        |
| Dronedarone      | Increased risk of QT-interval prolongation, risk of life-threatening additive effects on the QT interval, including TdP, co-administration is of contraindicated.                                                                                                                                                |
| Droperidol       | Increased risk of QT-interval prolongation, co-administration is not advisable, ECG monitoring is advised                                                                                                                                                                                                        |
| Ebastine         | Increased risk of QT-interval prolongation, co-administration is not advisable, ECG monitoring is advised                                                                                                                                                                                                        |
| Efavirenz        | Increased risk of QT-interval prolongation, CYP2B6 polymorphisms influence efavirenz concentration and QT prolongation with CYP2B6 *6/*6 genotype having a 2.25-fold higher C <sub>max</sub> than the CYP2B6 *1/*1 genotype and the mean QTc interval prolongation of 8.7 ms. Consider alternative to efavirenz. |
| Encorafenib      | Increased risk of QT-interval prolongation, co-administration is not advisable, ECG monitoring is advised                                                                                                                                                                                                        |
| Entrectinib      | Increased risk of QT-interval prolongation, avoid co-administration                                                                                                                                                                                                                                              |
| Eribulin         | Increased risk of QT-interval prolongation, co-administration is not advisable, ECG monitoring is advised                                                                                                                                                                                                        |

|              |                                                                                                           |
|--------------|-----------------------------------------------------------------------------------------------------------|
| Erythromycin | Increased risk of QT-interval prolongation, co-administration is not advisable, ECG monitoring is advised |
| Escitalopram | Increased risk of QT-interval prolongation, co-administration is not advisable, ECG monitoring is advised |
| Famotidine   | Increased risk of QT-interval prolongation, co-administration is not advisable, ECG monitoring is advised |
| Felbamate    | Increased risk of QT-interval prolongation, co-administration is not advisable, ECG monitoring is advised |
| Fingolimod   | Increased risk of QT-interval prolongation, co-administration is not advisable, ECG monitoring is advised |
| Flecainide   | Increased risk of QT-interval prolongation, co-administration is not advisable, ECG monitoring is advised |
| Fluconazole  | Increased risk of QT-interval prolongation, co-administration is not advisable, ECG monitoring is advised |
| Fluoxetine   | Increased risk of QT-interval prolongation, co-administration is not advisable, ECG monitoring is advised |
| Formoterol   | Increased risk of QT-interval prolongation, co-administration is not advisable, ECG monitoring is advised |
| Foscarnet    | Increased risk of QT-interval prolongation, co-administration is not advisable, ECG monitoring is advised |
| Fosphenytoin | Increased risk of QT-interval prolongation, co-administration is not advisable, ECG monitoring is advised |
| Galantamine  | Increased risk of QT-interval prolongation, co-administration is not advisable, ECG monitoring is advised |
| Gatifloxacin | Increased risk of QT-interval prolongation, co-administration is not advisable, ECG monitoring is advised |
| Gemifloxacin | Increased risk of QT-interval prolongation, co-administration is not advisable, ECG monitoring is advised |
| Glasdegib    | Increased risk of QT-interval prolongation, co-administration is not advisable, ECG monitoring is advised |
| Gonadorelin  | Increased risk of QT-interval prolongation, co-administration is not advisable, ECG monitoring is advised |
| Goserelin    | Increased risk of QT-interval prolongation, co-administration is not advisable, ECG monitoring is advised |
| Granisetron  | Increased risk of QT-interval prolongation, co-administration is not advisable, ECG monitoring is advised |

|                          |                                                                                                                           |
|--------------------------|---------------------------------------------------------------------------------------------------------------------------|
| Halofantrine             | Increased risk of QT-interval prolongation, co-administration is not advisable, ECG monitoring is advised                 |
| Haloperidol              | Increased risk of QT-interval prolongation, co-administration is not advisable, ECG monitoring is advised                 |
| Histrelin                | Increased risk of QT-interval prolongation, co-administration is not advisable, ECG monitoring is advised                 |
| Hydroquinidine           | Increased risk of QT-interval prolongation, co-administration is not advisable, ECG monitoring is advised                 |
| Hydroxyzine              | Increased risk of QT-interval prolongation, risk of TdP, co-administration is not advisable, ECG monitoring is advised    |
| Ibutilide                | Increased risk of QT-interval prolongation, co-administration is not advisable, ECG monitoring is advised                 |
| Iloperidone              | Increased risk of QT-interval prolongation, co-administration is not advisable, ECG monitoring is advised                 |
| Imipramine               | Increased risk of QT-interval prolongation, co-administration is not advisable, ECG monitoring is advised                 |
| Inotuzumab<br>Ozogamicin | Increased risk of QT-interval prolongation, co-administration is not advisable, ECG and electrolyte monitoring is advised |
| Itraconazole             | Increased risk of QT-interval prolongation, co-administration is not advisable, ECG monitoring is advised                 |
| Ivabradine               | Increased risk of QT-interval prolongation, co-administration is not advisable, ECG monitoring is advised                 |
| Ivosidenib               | Increased risk of QT-interval prolongation, co-administration is not advisable, ECG monitoring is advised                 |
| Ketoconazole             | Increased risk of QT-interval prolongation, co-administration is not advisable, ECG monitoring is advised                 |
| Lanthanum carbonate      | Reduced bioavailability of hydroxychloroquine, avoid administration within 2h of lanthanum dosing                         |
| Lapatinib                | Increased risk of QT-interval prolongation, co-administration is not advisable, ECG monitoring is advised                 |
| Lefamulin                | Increased risk of QT-interval prolongation, co-administration is not advisable, ECG monitoring is advised                 |
| Lenvatinib               | Increased risk of QT-interval prolongation, avoid co-administration, ECG monitoring is advised                            |
| Leuprolide               | Increased risk of QT-interval prolongation, co-administration is not advisable, ECG monitoring is advised                 |

|                   |                                                                                                                                                                               |
|-------------------|-------------------------------------------------------------------------------------------------------------------------------------------------------------------------------|
| Levofloxacin      | Increased risk of QT-interval prolongation, co-administration is not advisable, ECG monitoring is advised                                                                     |
| Lofexidine        | Increased risk of QT-interval prolongation, co-administration is not advisable, ECG monitoring is advised                                                                     |
| Lumefantrine      | Increased risk of QT-interval prolongation, co-administration is not advisable, ECG monitoring is advised                                                                     |
| Macimorelin       | Increased risk of QT-interval prolongation, co-administration is contraindicated, prior to administration of macimorelin, allow sufficient washout time of hydroxychloroquine |
| Mefloquine        | Increased risk of QT-interval prolongation, co-administration is not advisable, ECG monitoring is advised                                                                     |
| Mesoridazine      | Increased risk of QT-interval prolongation, increased risk of TdP, co-administration is contraindicated                                                                       |
| Methadone         | Increased risk of QT-interval prolongation, co-administration is not advisable, ECG monitoring is advised                                                                     |
| Methotrimeprazine | Increased risk of QT-interval prolongation, co-administration is not advisable, ECG monitoring is advised                                                                     |
| Metronidazole     | Increased risk of QT-interval prolongation, co-administration is not advisable, ECG monitoring is advised                                                                     |
| Mifepristone      | Increased risk of QT-interval prolongation, co-administration is not advisable, ECG monitoring is advised                                                                     |
| Mizolastine       | Increased risk of QT-interval prolongation, co-administration is not advisable, ECG monitoring is advised                                                                     |
| Moricizine        | Increased risk of QT-interval prolongation, co-administration is not advisable, ECG monitoring is advised                                                                     |
| Moxifloxacin      | Increased risk of QT-interval prolongation, co-administration is not advisable, ECG monitoring is advised                                                                     |
| Nafarelin         | Increased risk of QT-interval prolongation, co-administration is not advisable, ECG monitoring is advised                                                                     |
| Nelfinavir        | Increased risk of QT-interval prolongation, co-administration is not advisable, ECG monitoring is advised                                                                     |
| Nilotinib         | Increased risk of QT-interval prolongation, co-administration is not advisable, ECG monitoring is advised                                                                     |
| Norfloxacin       | Increased risk of QT-interval prolongation, co-administration is not advisable, ECG monitoring is advised                                                                     |
| Octreotide        | Increased risk of QT-interval prolongation, co-administration is not advisable, ECG monitoring is advised                                                                     |

|              |                                                                                                                                                                                                                                                                                                |
|--------------|------------------------------------------------------------------------------------------------------------------------------------------------------------------------------------------------------------------------------------------------------------------------------------------------|
| Ofloxacin    | Increased risk of QT-interval prolongation, co-administration is not advisable, ECG monitoring is advised                                                                                                                                                                                      |
| Olanzapine   | Increased risk of QT-interval prolongation, co-administration is not advisable, ECG monitoring is advised                                                                                                                                                                                      |
| Ondansetron  | Increased risk of QT-interval prolongation, co-administration is not advisable, ECG monitoring is advised                                                                                                                                                                                      |
| Osilodrostat | Increased risk of QT-interval prolongation, dose-dependent QT interval prolongation, co-administration is not advisable, ECG monitoring is advised, consider temporary discontinuation of osilodrostat if QTc $\geq$ 480 ms                                                                    |
| Osimertinib  | Increased risk of QT-interval prolongation, co-administration is not advisable, ECG monitoring is advised                                                                                                                                                                                      |
| Paliperidone | Increased risk of QT-interval prolongation, co-administration is not advisable, ECG monitoring is advised                                                                                                                                                                                      |
| Panobinostat | Increased risk of QT-interval prolongation, co-administration is not advisable, ECG monitoring is advised, consider temporary discontinuation of panobinostat if QTc $\geq$ 480 ms, discontinue panobinostat if QT prolongation does not resolve after correction of electrolyte abnormalities |
| Paroxetine   | Increased risk of QT-interval prolongation, co-administration is not advisable, ECG monitoring is advised                                                                                                                                                                                      |
| Pasireotide  | Increased risk of QT-interval prolongation, co-administration is not advisable, ECG monitoring is advised                                                                                                                                                                                      |
| Pazopanib    | Increased risk of QT-interval prolongation, co-administration is not advisable, ECG monitoring is advised                                                                                                                                                                                      |
| Pentamidine  | Increased risk of QT-interval prolongation, co-administration is not advisable, ECG monitoring is advised                                                                                                                                                                                      |
| Perphenazine | Increased risk of QT-interval prolongation, co-administration is not advisable, ECG monitoring is advised                                                                                                                                                                                      |
| Pimavanserin | Increased risk of QT-interval prolongation, avoid co-administration                                                                                                                                                                                                                            |
| Pimozide     | Increased risk of life-threatening QT-interval prolongation, co-administration is contraindicated                                                                                                                                                                                              |
| Pipamperone  | Increased risk of QT-interval prolongation, co-administration is not advisable, ECG monitoring is advised                                                                                                                                                                                      |
| Piperaquine  | Increased risk of life-threatening QT-interval prolongation, co-administration is contraindicated                                                                                                                                                                                              |

|                  |                                                                                                           |
|------------------|-----------------------------------------------------------------------------------------------------------|
| Pitolisant       | Increased risk of life-threatening QT-interval prolongation, co-administration is contraindicated         |
| Posaconazole     | Increased risk of QT-interval prolongation, co-administration is not advisable, ECG monitoring is advised |
| Probucol         | Increased risk of QT-interval prolongation, co-administration is not advisable, ECG monitoring is advised |
| Procainamide     | Increased risk of QT-interval prolongation, co-administration is not advisable, ECG monitoring is advised |
| Prochlorperazine | Increased risk of QT-interval prolongation, co-administration is not advisable, ECG monitoring is advised |
| Promethazine     | Increased risk of QT-interval prolongation, co-administration is not advisable, ECG monitoring is advised |
| Propafenone      | Increased risk of QT-interval prolongation, co-administration is not advisable, ECG monitoring is advised |
| Protriptyline    | Increased risk of QT-interval prolongation, co-administration is not advisable, ECG monitoring is advised |
| Quetiapine       | Increased risk of life-threatening QT-interval prolongation, co-administration is contraindicated         |
| Quinidine        | Increased risk of QT-interval prolongation, co-administration is not advisable, ECG monitoring is advised |
| Quinine          | Increased risk of QT-interval prolongation, co-administration is not advisable, ECG monitoring is advised |
| Ranolazine       | Increased risk of QT-interval prolongation, co-administration is not advisable, ECG monitoring is advised |
| Ribociclib       | Increased risk of QT-interval prolongation, co-administration is not advisable, ECG monitoring is advised |
| Rilpivirine      | Increased risk of QT-interval prolongation, co-administration is not advisable, ECG monitoring is advised |
| Risperidone      | Increased risk of QT-interval prolongation, co-administration is not advisable, ECG monitoring is advised |
| Ritonavir        | Increased risk of QT-interval prolongation, co-administration is not advisable, ECG monitoring is advised |
| Saquinavir       | Increased risk of life-threatening QT-interval prolongation, co-administration is contraindicated         |
| Sertindole       | Increased risk of QT-interval prolongation, co-administration is not advisable, ECG monitoring is advised |

|                  |                                                                                                                                                                                                                                                                                    |
|------------------|------------------------------------------------------------------------------------------------------------------------------------------------------------------------------------------------------------------------------------------------------------------------------------|
| Sertraline       | Increased risk of life-threatening QT-interval prolongation, co-administration is contraindicated                                                                                                                                                                                  |
| Sevoflurane      | Increased risk of QT-interval prolongation, co-administration is not advisable, ECG monitoring is advised                                                                                                                                                                          |
| Siponimod        | Increased risk of QT-interval prolongation, co-administration is contraindicated. If treatment with siponimod is considered, advice from a cardiologist should be sought regarding the switch to non-heart-rate lowering drugs or appropriate monitoring for treatment initiation. |
| Sodium Phosphate | Increased risk of QT-interval prolongation, co-administration is not advisable, ECG monitoring is advised                                                                                                                                                                          |
| Solifenacin      | Increased risk of QT-interval prolongation, co-administration is not advisable, ECG monitoring is advised                                                                                                                                                                          |
| Sorafenib        | Increased risk of QT-interval prolongation, co-administration is not advisable, ECG monitoring is advised                                                                                                                                                                          |
| Sotalol          | Increased risk of life-threatening QT-interval prolongation, avoid co-administration. If use is unavoidable, monitor ECG for excessive QT prolongation.                                                                                                                            |
| Sparfloxacin     | Increased risk of life-threatening QT-interval prolongation, co-administration is contraindicated                                                                                                                                                                                  |
| Sulpiride        | Increased risk of QT-interval prolongation, co-administration is not advisable, ECG and electrolyte monitoring is advised                                                                                                                                                          |
| Sultopride       | Increased risk of QT-interval prolongation, co-administration is not advisable, ECG monitoring is advised                                                                                                                                                                          |
| Sunitinib        | Increased risk of QT-interval prolongation, co-administration is not advisable, ECG monitoring is advised                                                                                                                                                                          |
| Tacrolimus       | Increased risk of QT-interval prolongation, co-administration is not advisable, ECG monitoring is advised                                                                                                                                                                          |
| Tamoxifen        | Increased risk of QT-interval prolongation, co-administration is not advisable, ECG monitoring is advised                                                                                                                                                                          |
| Telaprevir       | Increased risk of QT-interval prolongation, co-administration is not advisable, ECG monitoring is advised                                                                                                                                                                          |
| Telavancin       | Increased risk of QT-interval prolongation, co-administration is not advisable, ECG monitoring is advised                                                                                                                                                                          |
| Telithromycin    | Increased risk of QT-interval prolongation, co-administration is not advisable, ECG monitoring is advised                                                                                                                                                                          |
| Terfenadine      | Increased risk of life-threatening QT-interval prolongation, co-administration is contraindicated.                                                                                                                                                                                 |



|                 |                                                                                                           |
|-----------------|-----------------------------------------------------------------------------------------------------------|
| Tetrabenazine   | Increased risk of QT-interval prolongation, co-administration is not advisable, ECG monitoring is advised |
| Thioridazine    | Increased risk of life-threatening QT-interval prolongation, co-administration is contraindicated.        |
| Tizanidine      | Increased risk of QT-interval prolongation, co-administration is not advisable, ECG monitoring is advised |
| Tolterodine     | Increased risk of QT-interval prolongation, co-administration is not advisable, ECG monitoring is advised |
| Toremifene      | Increased risk of QT-interval prolongation, co-administration is not advisable, ECG monitoring is advised |
| Trazodone       | Increased risk of QT-interval prolongation, co-administration is not advisable, ECG monitoring is advised |
| Triclabendazole | Increased risk of QT-interval prolongation, co-administration is not advisable, ECG monitoring is advised |
| Trimipramine    | Increased risk of QT-interval prolongation, co-administration is not advisable, ECG monitoring is advised |
| Triptorelin     | Increased risk of QT-interval prolongation, co-administration is not advisable, ECG monitoring is advised |
| Vandetanib      | Increased risk of QT-interval prolongation, co-administration is not advisable, ECG monitoring is advised |
| Vardenafil      | Increased risk of QT-interval prolongation, co-administration is not advisable, ECG monitoring is advised |
| Vemurafenib     | Increased risk of QT-interval prolongation, co-administration is not advisable, ECG monitoring is advised |
| Venlafaxine     | Increased risk of QT-interval prolongation, co-administration is not advisable, ECG monitoring is advised |
| Vilanterol      | Increased risk of QT-interval prolongation, co-administration is not advisable, ECG monitoring is advised |
| Vinflunine      | Increased risk of QT-interval prolongation, co-administration is not advisable, ECG monitoring is advised |
| Voriconazole    | Increased risk of QT-interval prolongation, co-administration is not advisable, ECG monitoring is advised |
| Vorinostat      | Increased risk of QT-interval prolongation, co-administration is not advisable, ECG monitoring is advised |
| Ziprasidone     | Increased risk of life-threatening QT-interval prolongation, co-administration is contraindicated.        |

|                |                                                                                                                                                                                                                                                                              |
|----------------|------------------------------------------------------------------------------------------------------------------------------------------------------------------------------------------------------------------------------------------------------------------------------|
| Zotepine       | Increased risk of QT-interval prolongation, co-administration is not advisable, ECG monitoring is advised                                                                                                                                                                    |
| Zuclopenthixol | Increased risk of life-threatening QT-interval prolongation, co-administration is contraindicated. Cases of QT prolongation, ventricular arrhythmias and fibrillation, ventricular tachycardia, torsade de pointes, and sudden death have been reported with zuclopenthixol. |

<sup>a</sup>TdP: torsade de point

### References Table 5:

1. Liverpool Uo. Covid-19 Drug Interactions. <http://wwwcovid19-druginteractionsorg/>.
2. WHO. Summaries of evidence from selected experimental therapeutics. <https://www.who.int/ebola/drc-2018/summaries-of-evidence-experimental-therapeuticspdf?ua=1>.
3. Kennisbank. Actuele vakinhoudelijke informatie. <https://kennisbankknmpnl/login?destination=>.
4. Deng P, Zhong D, Yu K, Zhang Y, Wang T, Chen X. Pharmacokinetics, metabolism, and excretion of the antiviral drug arbidol in humans. *Antimicrobial agents and chemotherapy*. 2013;57(4):1743-1755.
5. PLAQUENIL® oral tablets, hydroxychloroquine sulfate oral tablets. *Product Information*. 2017; Concordia Pharmaceuticals Inc.(Kansas City, MO, USA).
6. WAKIX® oral tablets, pitolisant oral tablets. *Product Information*. 2019; Harmony Biosciences LLC(Plymouth Meeting, PA, USA).
7. BETAPACE® oral tablets, sotalol HCl oral tablets. *Product Information*. 2016; Covis Pharmaceuticals Inc.(Chesterbrook, PA, USA).
8. RIDAURA® oral capsules, auranofin oral capsules. *Product Information*. 2017; Sebela Pharmaceuticals Inc.(Roswell, GA, USA).
9. ISTURISA® oral tablets, osilodrostat oral tablets. *Product Information*. 2020; Recordati Rare Disease Inc.(Lebanon, NJ, USA).
10. MACRILEN™ oral granules, macimorelin oral granules. *Product Information*. 2018; Strongbridge US Inc.(Trevose, PA, USA).
11. ROZLYTREK™ oral capsules, entrectinib oral capsules. *Product Information*. 2019; Genentech Inc.(South San Francisco, CA, USA).
12. DOLMATIL oral tablets, sulpiride oral tablets. *Product Information*. 2016; Aventis Pharma Limited(Guildford, Surrey, United Kingdom).
13. TAGRISSO® oral tablets, osimertinib oral tablets. *Product Information*. 2018; AstraZeneca Pharmaceuticals LP(Wilmington, DE, USA).
14. DAURISMO™ oral tablets, glasdegib oral tablets. *Product Information*. 2018; Pfizer Labs (New York, NY, USA).
15. XENLETA™ oral tablets, intravenous injection, lefamulin oral tablets, intravenous injection. *Product Information*. 2019; Nabriva Therapeutics US Inc.(King of Prussia, PA, USA).
16. KISQALI® oral tablets, ribociclib oral tablets. *Product Information*. 2017; Novartis Pharmaceuticals Corporation(East Hanover, NJ, USA).
17. SOLGANAL® aurothioglucose. *Product Information*. 1996; Schering Corporation(Kenilworth, NJ, USA).

18. Gilman AGR, T. W., Nies AS, al. e. Goodman and Gilman's The Pharmacological Basis of Therapeutics, 8th edition. 1990;Pergamon Press(New York, NY, USA).
19. LENVIMA® oral capsules, lenvatinib oral capsules. *Product Information*. 2018;Eisai Inc(Woodcliff Lake, NJ, USA).
20. AUSTEDO™ oral tablets, deutetrabenazine oral tablets. *Product Information*. 2017;Teva Pharmaceuticals USA Inc.(North Wales, PA, USA).
21. BESPONSA™ intravenous injection, inotuzumab ozogamicin intravenous injection. *Product Information*. 2017;Pfizer Inc.(Philadelphia, PA, USA).
22. Hydroxyzine HCl oral tablets. *Product Information*. 2016;Harris Pharmaceutical Inc.(Fort Myers, FL, USA).
23. BARHEMSYS® intravenous injection, amisulpride intravenous injection. *Product Information*. 2020;Acacia Pharma Inc.(Indianapolis, IN, USA).
24. FARYDAK® oral capsules, panobinostat oral capsules. *Product Information*. 2015;Novartis Pharmaceuticals Corporation(East Hanover, NJ, USA).
25. TIBSOVO® oral tablets, ivosidenib oral tablets. *Product Information*. 2018;Agios Pharmaceuticals Inc.(Cambridge, MA, USA).
26. ZOLOFT oral tablets, oral solution, sertraline HCl oral tablets, oral solution. *Product Information*. 2017;Roerig(New York, NY, USA).
27. CORDARONE® oral tablets, amiodarone HCl oral tablets. *Product Information*. 2016;Wyeth Pharmaceuticals Inc.(Philadelphia, PA, USA).
28. LUCEMYRA™ oral tablets, lofexidine oral tablets. *Product Information*. 2018;US WorldMeds LLC(Louisville, KY, USA).
29. FOSRENOL® oral chewable tablets oral powder, lanthanum carbonate oral chewable tablets oral powder. *Product Information*. 2014;Shire US Inc.(Wayne, IN, USA).
30. LAMPRENE® oral capsules, clofazimine oral capsules. *Product Information*. 2019;Novartis Pharmaceuticals Corporation(East Hanover, NJ, USA).
31. MULTAQ® oral tablets, dronedarone oral tablets. *Product Information*. 2014;Sanofi-Aventis U.S. LLC(Bridgewater, NJ, USA).
32. SUSTIVA® oral capsules, oral tablets, efavirenz oral capsules, oral tablets. *Product Information*. 2016;Bristol-Myers Squibb Company(Princeton, NJ, USA).
33. CLOPIXOL-ACUPHASE® intramuscular injection, zuclopenthixol acetate intramuscular injection. *Product Information*. 2014;Lundbeck Canada Inc.(Montreal, QC, Canada).
34. Clopixol oral tablets, zuclopenthixol dihydrochloride oral tablets. *Product Information*. 2015;Lundbeck Limited(Milton Keynes, United Kingdom).
35. Clopixol-Acuphase intramuscular injection solution, zuclopenthixol acetate intramuscular injection solution. *Product Information*. 2015;Lundbeck Limited(Milton Keynes, United Kingdom).
36. Chen CY, Wang FL, Lin CC. Chronic hydroxychloroquine use associated with QT prolongation and refractory ventricular arrhythmia. *Clinical toxicology (Philadelphia, Pa)*. 2006;44(2):173-175.
37. Keivanidou A, Arnaoutoglou C, Krommydas A, et al. Ciprofloxacin induced acquired long QT syndrome in a patient under class III antiarrhythmic therapy. *Cardiology journal*. 2009;16(2):172-174.
38. Morgan ND, Patel SV, Dvorkina O. Suspected hydroxychloroquine-associated QT-interval prolongation in a patient with systemic lupus erythematosus. *Journal of clinical rheumatology : practical reports on rheumatic & musculoskeletal diseases*. 2013;19(5):286-288.
39. Prabhakar M, Krahn AD. Ciprofloxacin-induced acquired long QT syndrome. *Heart rhythm*. 2004;1(5):624-626.
40. Takaya T, Okamoto M, Yodoi K, et al. Torsades de Pointes with QT prolongation related to donepezil use. *Journal of cardiology*. 2009;54(3):507-511.

41. Tanaka A, Koga S, Hiramatsu Y. Donepezil-induced adverse side effects of cardiac rhythm: 2 cases report of atrioventricular block and Torsade de Pointes. *Internal medicine (Tokyo, Japan)*. 2009;48(14):1219-1223.
42. Wijnands MJ, Allebes WA, Boerbooms AM, van de Putte LB, van Riel PL. Thrombocytopenia due to aurothioglucose, sulphasalazine, and hydroxychloroquine. *Annals of the rheumatic diseases*. 1990;49(10):798-800.
43. BETAPACE® AF oral tablets, sotalol HCl oral tablets *Product Information*. 2016;Covis Pharmaceuticals Inc.(Chesterbrook, PA, USA).
44. MAYZENT® oral tablets, siponimod oral tablets. *Product Information*. 2019;Novartis Pharmaceuticals Corporation(East Hanover, NJ, USA).
45. ZYKADIA® oral capsules, oral tablets, ceritinib oral capsules, oral tablets. *Product Information*. 2019;Novartis Pharmaceuticals Corporation(East Hanover, NJ, USA).
46. NUPLAZID™ oral tablets, pimavanserin oral tablets. *Product Information*. 2016;ACADIA Pharmaceuticals(San Diego, CA, USA).
47. BRAFTOVI™ oral capsules, encorafenib oral capsules. *Product Information*. 2018;Array BioPharma Inc.(Boulder, CO, USA).
48. ARISTADA® intramuscular extended-release injection, aripiprazole lauroxil intramuscular extended-release injection *Product Information*. 2017;Alkermes Inc. (Waltham, MA, USA).
49. ABILIFY® oral tablets, oral solution, intramuscular injection, aripiprazole oral tablets, oral solution, intramuscular injection. *Product Information*. 2014;Otsuka America Pharmaceutical Inc.(Rockville, MD, USA).
50. BELBUCA™ buccal film, buprenorphine buccal film. *Product Information*. 2016;Endo Pharmaceuticals Inc.(Malvern, PA, USA).
51. BUPRENEX® intravenous injection, intramuscular injection, buprenorphine HCl intravenous injection, intramuscular injection. *Product Information*. 2016;Indivior Inc.(Richmond, VA, USA).
52. BUTRANS® transdermal system patch, buprenorphine transdermal system patch. *Product Information*. 2016;Purdue Pharma L.P.(Stamford, CT, USA).
53. Drug Safety Communications: FDA urges caution about withholding opioid addiction medications from patients taking benzodiazepines or CNS depressants: careful medication management can reduce risks. 2017;US Food and Drug Administration (FDA)(Silver Spring, MD, USA).
54. Leden I. Digoxin-hydroxychloroquine interaction? *Acta medica Scandinavica*. 1982;211(5):411-412.
55. Quetiapine fumarate oral tablets, quetiapine fumarate oral tablets. *Product Information*. 2015;Accord Healthcare Inc.(Durham, NC, USA).
56. EGATEN™ oral tablets, triclabendazole oral tablets. *Product Information*. 2019;Novartis Pharmaceuticals Corporation(East Hanover, NJ, USA).
